# Supplementary material
Source: publisher site journal article supplement (https://www.degruyterbrill.com/publication/isbn/9783839441367/downloadAsset/9783839441367_Leseprobe.pdf)
Supplement: Supplementary file 1 [file 9783839441367_Leseprobe.pdf]

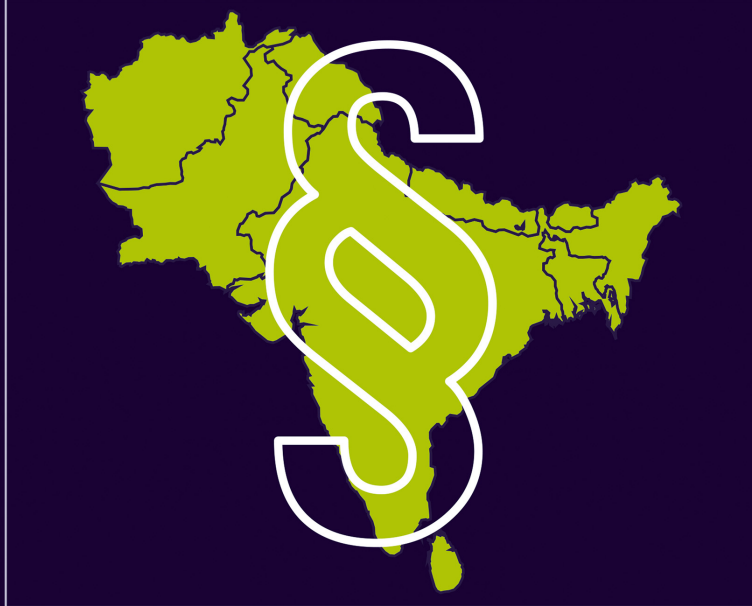

Raphael Schwegmann

---

# Macht-(W)Orte

---

Kulturelle Geographien des  
Rechts und der Ökonomie  
am Beispiel südasiatischer  
Migrationsgeschichten

**[transcript]** Sozial- und Kulturgeographie

**Aus:**

*Raphael Schwegmann*

## **Macht-(W)Orte**

Kulturelle Geographien des Rechts und der Ökonomie  
am Beispiel südasiatischer Migrationsgeschichten

November 2018, 312 Seiten, kart., 39,99 €, ISBN 978-3-8376-4136-3

Migrations- und Flüchtlingsdebatten machen den Bedarf an neuen Arbeiten zur Wirkweise ökonomischer und rechtlicher Macht in Raum und Zeit deutlich, sofern aktuelle weltpolitische Konstellationen auch vor der Schablone vergangener Geographien des Kapitalismus begriffen werden.

Am Beispiel südasiatischer Auswanderergeschichten aus dem 20. Jahrhundert skizziert Raphael Schwegmann die kolonialen und postkolonialen Verflechtungen materiell-technischer und diskursiver Globalisierungen zwischen Europa und Asien. Seine historisch-geographische Dispositivanalyse zum komplexen Zusammenspiel von Fremd- und Selbstkolonialisierung verkörpert zugleich den Abschluss einer Trilogie zur Oberthematik »Ökonomie verorten: Raum-Zeit-Reisen«.

**Raphael Schwegmann** (Dr. rer. nat.) forscht zur Globalisierung des Rechts und der Ökonomie, zu Ansätzen der Stadt- und Regionalentwicklung sowie zu Fragen von Mobilität und Migration. Zuvor bei transcript erschienen: »Nacht-Orte. Eine kulturelle Geographie der Ökonomie« (2016) und »Kraft-Horte. Mobile Vergnügungstopographien europäischer Großstadtnächte« (2017).

Weitere Informationen und Bestellung unter:

[www.transcript-verlag.de/978-3-8376-4136-3](http://www.transcript-verlag.de/978-3-8376-4136-3)

# Inhalt

---

## **Vorwort und Dank: Macht-(W)Orte | 9**

### **1 Navigation: Wirtschaft und Recht in Raum und Zeit | 15**

- a) Rahmungen | 15
- b) Ordnungen | 21
- c) Grenzen | 23

### **2 Kontextualisierung: Macht *on the move* | 29**

- a) Vorarbeiten und Forschungsstand | 29
  - (1) Migrationsgeschichte(n) des Indischen Ozeans | 29
  - (2) Performativität normativer Ordnungen | 39
  - (3) Kulturtheorie zwischen den Disziplinen | 48
- b) Eine kurze Kolonialgeschichte Südasiens | 52
- c) Eine maritime Handelsgeschichte des Indischen Ozeans | 57
  - (1) Das *British Empire* | 58
  - (2) Der maritime Arbeitsmarkt | 66
  - (3) Das ‚*Steamship Empire*‘ | 74

### **3 Quelle und Methode: Zwischen Mensch und Materialität | 79**

- a) Historische Kulturgeographien | 80
- b) *Oral History* | 86
  - (1) Die Hauptquelle | 86
  - (2) Quellenkritische Betrachtungen | 92
- c) Diskurs- oder Dispositivforschung? | 99

### **4 Textualisierung: Eine Dispositivanalyse der Macht | 105**

- a) Wirtschaft und Recht nach den *Cultural Turns* | 105
  - (1) Verlebendigung ‚kalter‘ Ökonomie | 105
  - (2) Normierung durch Normalisierung? | 107
  - (3) Identität – Macht – Ökonomie | 112
  - (4) Recht – Wissen – Macht | 120
  - (5) Kulturelle Geographien des Rechts | 128
  - (6) Recht als performatives Dispositiv | 148

b) Dimensionen der Wirtschaftswirkung und der Rechtsrealisierung | 162

(1) Geld | 164

(2) Konsum | 168

(3) Arbeit | 172

(4) Netzwerke | 177

(5) Orte | 182

(6) Nation | 192

(7) Bildung | 201

(8) Normen | 210

(9) Infrastrukturen | 213

**5 Horizonte: Subtile Subjektivierungen | 219**

a) Konklusionen | 220

(1) Selbstökonomisierung | 220

(2) Selbstverrechtlichung | 226

b) Perspektiven | 231

c) Reflexionen | 247

**6 Anhang | 253**

a) Zeittafel | 253

b) Karten | 256

c) Bibliographie | 268

(1) Primärquellen | 268

(2) Sekundärquellen | 269

*Bei einem Denker sollte man nicht fragen:  
welchen Standpunkt nimmt er ein, sondern:  
wie viele Standpunkte nimmt er ein?  
Mit anderen Worten: hat er einen geräumigen  
Denkapparat oder leidet er an Platzmangel [...]?*

Egon Friedell, Steinbruch, 1922

# 1 Navigation: Wirtschaft und Recht in Raum und Zeit

---

## A) RAHMUNGEN

Hypernervöse Märkte im Zeichen der Wirtschafts- und Finanzkrise sowie Staatsverschuldung auf der einen, Debatten um ‚rechtsfreie Räume‘, Einwanderung und Terrorismus auf der anderen Seite – schon diese wenigen Schlagworte zeugen nicht zuletzt von der großen Relevanz von Wirtschaft und Recht als überaus wirkmächtige Parameter des in vielerlei Hinsicht ‚unsicher‘ gewordenen 21. Jahrhunderts. Doch ist dies tatsächlich ein ‚neues‘ Phänomen, ist es auf westlich-kapitalistische Gesellschaften begrenzt?<sup>1</sup> Oder handelt es sich um hochgradig mobile, möglicherweise auch veränderbare Ordnungen in Raum und Zeit? Wie wirken, was bewirken Wirtschaft und Recht im Kontext der Globalisierung? Und wer oder was sind die Akteure und Architekten dahinter?

Im Rahmen der Studie „Macht-(W)Orte“ sollen einige jener Ausdrücke und Anleitungen globaler, wenngleich nicht flächendeckender, sondern zeit-räumlich

---

1 Siehe zum Kapitalismusbegriff insbesondere Kockas Erläuterungen (2013: 6 ff.) sowie zur ideengeschichtlichen Einordnung den von Kocka und van der Linden herausgegebenen Sammelband „Capitalism. The Reemergence of a Historical Concept“ (2016). Darin nennt Kocka drei Hauptmerkmale des Kapitalismus: Erstens sei Recht essentiell, damit die Akteure des Kapitalismus autonome und dezentralisierte wirtschaftliche Entscheidungen treffen können (auch Diaz-Bone stellt heraus: „Keine moderne Ökonomie ist denkbar ohne die fundamentalen juristischen Grundlagen wie Eigentumsrecht oder Vertragsrecht“, Diaz-Bone 2017: 94); zweitens würden Ressourcen, Produkte und Arbeit in der Welt des Kapitalismus kommodifiziert, d.h. zur handelbaren Ware werden; drittens sei Kapital ein zentrales Merkmal dieser Wirtschaftsform, d.h. insbesondere das Investieren von Erspartem oder auch von Erträgen mit der Hoffnung auf höhere Gewinne in der Zukunft (Kocka 2016: 4 f.).

fragmentierter sowie immer unterschiedlich stark ausgeprägter Rechts- und Ökonomieherrschaft aufgezeigt werden. Deren alltägliche Herstellungen können am hochaktuellen Gegenstand Migration anschaulich illustriert werden. Dabei empfiehlt es sich, auch und besonders die Verstrickungen zwischen beiden normativen Ordnungen zu beleuchten. Ambitioniertes Ziel dieses Projekts ist schließlich der Versuch, ein integratives Analyse- und Interpretationsraster zu entwickeln, das Wirtschaft und Recht in ihrer historischen wie geographischen Wirkmächtigkeit sichtbar machen möchte. Zugleich soll hiermit ein Impuls gegeben werden: für weitergehende Beschäftigungen dieser als auch anderer normativer Ordnungen durch die Linse einer alternativen Betrachtung eben dieser dominanten Sphären des menschlichen Lebens. Damit wird ein maximal offenes Gesprächsangebot präsentiert, das die wissenschaftliche Be- und Verhandlung von Neukonzeptualisierungen normativer Ordnungen gezielt (heraus-)fordern möchte.

Als empirisches Fallbeispiel dienen in diesem Zusammenhang Lebensgeschichten südasiatischer *Lascars* (Adams [Hrsg.] 1987a),<sup>2</sup> die in den 20er, 30er und 40er Jahren des 20. Jahrhunderts gen England emigrierten und sich im Zuge derartiger Bewegungen sowie insbesondere rückblickend in ihren Selbstzeugnissen in komplexe wirtschaftliche und rechtliche Räume einfügten (oder einfügen mussten?). Anhand ihrer in den 1980er Jahren von ihnen erzählten und von der Herausgeberin Caroline Adams verschriftlichten Biographien können so historische Parameter dichter Verstrickungen in Macht- und Regulationsmechanismen aufgezeigt werden, die als Teil eines Prozesses hin zu unseren heutigen Wirtschafts- und Rechtshegemonien bzw. deren Wirk(un)möglichkeiten aufgefasst werden können.

Denn „the world economic crisis that struck in late 2008 highlighted above all the relevance of global, macro-economic, structural factors, and how they ‚drive‘ migration, both positively and negatively“ (King 2012: 138). Gleichzeitig erlaubt ein Blick auf die alltäglichen Wirkweisen von Wirtschaft und Recht im Kontext von Migrationsbewegungen auch eine Beschäftigung mit ‚dem Kleinen‘

---

2 Die Bezeichnung *Lascar* stammt wohl ursprünglich vom persischen Wort *lashkar*/*lashkari* und bedeutete soviel wie ‚Soldat‘ oder ‚Armee‘, wie Ahuja (2002: 39 f.) oder auch Ghosh (2010: 16) erklären. Diese militärische Bedeutung hatte das freie lexikalische Morphem lange Zeit noch auf dem indischen Subkontinent, während sich der Begriff in Europa eher in nautische Richtung entwickelt hat: Seit ca. 1600 wurde mit *Lascar* im Portugiesischen ein (aus Afrika oder Asien stammender) Seemann bezeichnet, später fand sich diese semantische Verknüpfung auch im Englischen wieder (ebd.).

– mit einzelnen Akteuren, oftmals, zumindest situativ, auch räumlich eher in der Peripherie verortet, die im Zuge von Subjektivierungsprozessen responsibilisiert und ‚er-mächtigt‘ werden.<sup>3</sup> Denn „Gesellschaft erwächst aus der Alltagspraxis an *bestimmten* Orten und zu *bestimmten* Zeiten“ (Osterhammel 2009a: 1056 f.). Daraus sollte nicht nur eine historisch-geographische Herangehensweise folgen, sondern insbesondere die wissenschaftliche Wertschätzung alltäglicher Gesellschafts(re)produktion. „Im Kleinen das Große suchen“ (Hiebl & Langthaler [Hrsg.] 2012), so könnte man diesen Ansatz nennen, wenn durch eine mikrogeschichtliche Perspektive ‚große‘ Themen wie machtvoll normative Ordnungen verfolgt werden.<sup>4</sup>

Mit diesem Forschungsprojekt lassen sich neben Synergieeffekten für ein gesamtgesellschaftliches Verständnis von Recht und Wirtschaft im Migrationskontext zwei wissenschaftsinterne Hauptziele anpeilen, die mit dem Label einer *integrativen Inter- und Intradisziplinarität* versehen werden könnten. *Zum einen* soll das Vorhaben integrativ für das Verhältnis verschiedener universitärer Fächer zueinander wirken. Die Untersuchung versteht sich als kreative Zusammenführung verschiedenster geistes- und sozialwissenschaftlicher Disziplinen – insbesondere, aber bei weitem nicht ausschließlich, der Geschichts- und der Rechtswissenschaft mit der Humangeographie – und findet das verbindende Element in einer konstruktivistischen Prämissen folgenden, kulturtheoretisch fundierten Per-

---

3 ‚Subjektivierung‘ wird hier unter Bezugnahme auf den ‚Späten Foucault‘ gedacht: Während dieser in früheren Arbeiten vom eher einseitigen Festschreiben eines Individuums auf eine konkrete Subjektposition innerhalb einer normativ wirkenden Ordnung ausgeht (vgl. Foucault 1975), betont er später stärker die Selbstgestaltungen, -techniken und -regierungen, mithin die aktiven Reproduktionen der konkreten Ordnungen durch die subjektivierten Individuen selbst im Sinn einer „Sorge um sich“, einer ‚Selbst-Abriechung‘, die zur Subjektivierung und den in ihr enthaltenen Machtverhältnissen beiträgt (vgl. Foucault 1985, 1989, 1993, 2008). Daher „lässt sich [...] nicht auf einen eindeutigen Gegensatz von aktiven Kolonisatoren und passiven Kolonisierten schließen“ (Reinhard 2016: 26). Laut Reinhard könne man auch nicht immer klar zwischen Opfer und Täter entscheiden; sowohl innerhalb der großen, heterogenen Gruppe der Kolonisatoren als auch innerhalb der Gesamtheit der Kolonisierten müsse man dementsprechend differenzieren. In jedem Fall hätten die Kolonisierten die koloniale wie die postkoloniale Welt aktiv mitgestaltet (ebd.).

4 Beckert (2014: 441) sieht den Kapitalismus gerade im ländlichen Raum, teilweise fernab der urbanen Zentren (re-)produziert.



formativitätsforschung.<sup>5</sup> Vor diesem Hintergrund verortet sich das Vorhaben im Grenzgebiet der Disziplinen, indem es die „Pluralisierung der theoretischen und methodischen Ansätze“ (Reuber 2012: 22) mit einschließt, wenn diese Arbeit zwar ein Plädoyer für eine bestimmte Herangehensweise, aber kein hegemoniales Patentrezept sein möchte. Auf die kulturwissenschaftliche Durchdringung ökonomischer und rechtlicher Prozesse abzielend, begreift sie sich als schlichter Versuch, diesen innovativen Zwischenraum in wissenschaftlicher Hinsicht fruchtbar ‚nutzbar‘ zu machen.

*Zum anderen* soll versucht werden, verschiedene Subdisziplinen innerhalb der Humangeographie, die hier ob ihrer Stärke im interdisziplinären und multiperspektivischen Arbeiten als Leitwissenschaft dient,<sup>6</sup> einander zuzuführen. Mit Blick auf die Humangeographie ließen sich etwa ein sozial-, politik- bzw. migrationsgeographischer Gegenstand, eine kulturgeographische Perspektive sowie schließlich die übergeordnete thematische Ausrichtung auf wirtschafts- und rechtsgeographische Inhalte ausmachen. Ziel ist mit der konsequenten Fokussierung auf Macht die Entwicklung eines integrativen Ansatzes, der humangeographische Subdisziplinen unter dem ‚Dach der Macht‘ einer zumindest ansatzweise ganzheitlichen Humangeographie wieder zusammenführt, statt einer weiteren intradisziplinären Fragmentierung neuen Nährboden zu bereiten. Machtfragen sollen somit nicht nur vorrangig und explizit in der Politischen Geographie (vgl. dazu Painter 2015), sondern von allen Humangeographen sowie generell von allen Geistes- und Sozialwissenschaften näher betrachtet werden, um sich der gesellschaftlichen Verantwortung als Wissenschaftler im Kontext zunehmend komplexerer Welten angemessen zu stellen.

Diese Studie adressiert und schließt dabei zugleich zwei größere subdisziplinäre Forschungslücken innerhalb der Humangeographie: eine erste im Zwischenraum von Historischer Geographie und Neuer Kulturgeographie (Neue

---

5 Zum Konzept der Performativität sei an dieser Stelle auf das Subkapitel 2a 2 verwiesen.

6 Diese Arbeit ist genuin geographisch: Sie befasst sich mit ‚klassisch‘ geographischen Kategorien wie Ort und Verortung – und Grenzen. Es geht beispielsweise um Grenzen im Migrationskontext (empirisch), um Grenzen des global wirkmächtigen und lokal sichtbaren Kapitalismus (thematisch), um Grenzen zwischen verschiedenen kulturtheoretischen Deutungsangeboten (theoretisch-konzeptionell), um Grenzen methodischer Herangehensweisen (methodologisch) wie auch um Grenzen zwischen der Geographie, der Geschichtswissenschaft und weiteren geistes- und sozialwissenschaftlichen Disziplinen, ihren Erklärungsansätzen und Subdisziplinen (*inter-* und eben *intradisziplinär*).

Kulturgeographie *meets* Historische Geographie: ‚Historische Kulturgeographien‘) und eine zweite im Spannungsfeld von Recht und Geographie, insbesondere vor dem Hintergrund des Mangels an kulturgeographischer Rechtsforschung (Neue Kulturgeographie *meets* Recht: ‚Kulturelle Geographien des Rechts‘). Die Relevanz der zweiten soll an dieser Stelle bereits kurz verdeutlicht werden, da das Forschungsfeld Recht und Geographie auf den ersten Blick höchst irritierend wirken dürfte.<sup>7</sup>

Doch tatsächlich nur auf den ersten Blick. Denn im globalen Kontext unserer heterogenen postmodernen Welt sind neue Perspektiven auf das Verhältnis von Recht, Raum und Macht notwendiger denn je. Stichworte wie Rechtspluralismus sowie die steigende Diversifizierung und Digitalisierung, Fragmentierung und Mobilisierung des Rechts auf allen räumlichen Maßstabsebenen stellen Gesellschaft, Wirtschaft und Wissenschaft vor große Herausforderungen.<sup>8</sup> Die Human-geographie mit ihrer Expertise in raum- und ortstheoretischen Fragestellungen, ihrem methodischen *Knowhow* bei der Beschäftigung mit empirischen Fällen des alltäglichen Lebens, ihrer Multiperspektivität, Vernetzungsbereitschaft und grundsätzlichen Offenheit gegenüber unterschiedlichsten Erschließungsmöglichkeiten kann diesbezüglich als ‚Globalwissenschaft‘ *per se* dabei helfen, Rechtstransfer, -mobilität und -pluralismus im globalen Zeitalter analytisch umfangreicher zu durchdringen als herkömmliche rechtswissenschaftliche Ansätze.<sup>9</sup> Kulturtheoretische Impulse könnten sodann als kritisch-reflektierende Brücke zwischen beiden sowie weiteren geistes- und sozialwissenschaftlichen Disziplinen fungieren und die Macht des Rechts theoretisch gesättigt rekonstruieren.

Das Forschungsvorhaben formuliert in diesem Tenor erste Gedanken zur Entwicklung eines neuen *emerging field* einer zusehends inter-, bisweilen gar transdisziplinären Wissenschaftslandschaft im Sinne einer ‚*Cultural Legal Geography*‘.<sup>10</sup> Diese fragt im Anschluss an den *Cultural Turn* nach der (Re-)Produktion von Recht, was diskursive, praktische sowie materielle Auf- und Ausführungen rechtlicher (Be-)Deutungen auf unterschiedlichen räumlichen

---

7 Genauerer zu dem Spannungsverhältnis von Recht und Geographie folgt im Subkapitel 4a 6.

8 Grundsätzlich gilt: „Mobility not only challenges the everyday lives of millions of people, it also challenges scientific understandings of society and culture“ (Verne 2012: 1).

9 Zum Themenkomplex ‚Recht und Globalisierung‘ empfiehlt sich insbesondere das umfassende Werk „Globalisation, Law and the State“ (Auby 2017).

10 Alternativ ließe sich diese Forschungsperspektive auch als ‚*Cultural Geography of Law*‘ bezeichnen.

Maßstabsebenen beinhaltet.<sup>11</sup> Empirisch gesehen beschäftigt sich der Ansatz mit südasiatischen Migrationsbiographien des 20. Jahrhunderts. Dabei wird versucht, eine Brücke zwischen kolonialen und postkolonialen Rechtsverständnissen in Indien nachzuzeichnen.<sup>12</sup> Das Projekt verbindet dabei nicht ‚nur‘ Rechtswissenschaft und Geographie, sondern insbesondere noch zwei weitere Disziplinen: die Geschichtswissenschaft, da es um raum-zeitliche Verortungen langfristiger hegemonialer Denkkordnungen geht, sowie die Wirtschaftswissenschaften<sup>13</sup>, da rechtliche Bedeutungszuschreibungen immer vor dem Hintergrund der Einbindung in kapitalistische Strukturen des alltäglichen Wirtschaftens gesehen werden müssen. So skizziert das vorgestellte Vorhaben auch die Macht normativer Ordnungen im Kontext des maritimen Arbeitsmarktes zwischen Südasien und Europa, der Migrationsentscheidungen beeinflussen konnte.

Beides, die historisch-kulturgeographische sowie die rechtsgeographische Herangehensweise, ließe sich zu ‚Historischen Kulturgeographien des Rechts‘ verbinden – oder, weiter gefasst, zu ‚Historischen Kulturgeographien des Rechts und der Ökonomie‘ (im Anschluss an den *Cultural Turn* als Alternative zu herkömmlicher *Law and Economics*-Forschung, wie bislang vor allem von Rechts- und Wirtschaftswissenschaftlern betrieben) bzw. gar zu ‚Historischen Kulturgeographien normativer Ordnung‘, um auch andere machtvolle Gefüge wie insbesondere Politik oder Religion neben Recht und Wirtschaft als potenzielle Forschungsgegenstände nicht auszuschließen und gerade auch die reziproken Ver-

---

11 ‚Der‘ *Cultural Turn* wird hier maximal weit gedacht: im Sinne von eigentlich mehreren *Cultural Turns*, was jüngere Paradigmen wie den *Practice* oder den *Material Turn* mit einschließt.

12 Zur postkolonialen Theorie empfiehlt sich als Einführung das hervorragende Überblickswerk von Castro Varela und Dhawan (2015).

13 An dieser Stelle versteht der Autor ‚Wirtschaftswissenschaften‘, im herkömmlichen Sprachgebrauch ansonsten die Bezeichnung für die Volkswirtschafts- und die Betriebswirtschaftslehre, durchaus im erweiterten Verständnis einer *Pluralen Ökonomik*, welche die Pluralität und das bewusste Nebeneinander verschiedenster paradigmatischer, disziplinärer, theoretisch-konzeptioneller wie methodischer Zugriffsmöglichkeiten bewusst fördert, ergo als ‚Wirtschafts-Wissenschaften‘, d.h. im Sinne aller sich in den unterschiedlichsten Formen mit Wirtschaft beschäftigenden Wissenschaften. Analoges gilt für die von mir zuvor adressierte Rechtswissenschaft: Meine Arbeit richtet sich letztlich an alle sich für Recht Interessierenden, an alle ‚Rechts-Wissenschaften‘, ergo nicht nur – wenngleich natürlich auch und besonders – an Juristen, sondern z.B. auch an Kulturanthropologen, Soziologen, Philosophen, Politikwissenschaftler und viele mehr.

bindungen zwischen eben diesen normativen Ordnungen multiperspektivisch sowie speziell räumlich und zeitlich reflektierend zu behandeln: Historische Kulturgeographien möchten im wahrsten Sinne des Wortes ‚Welt-Bilder‘ – dieser Ausdruck zielt nicht zuletzt auf das raumbezogene Selbstverständnis und die visuelle Ausrichtung der Geographie ab – re- bzw. dekonstruieren. Als ein nicht zwingend übergeordnetes, aber sicher weiteres Ziel dieser Arbeit könnte man vor diesen Hintergründen die Stärkung eines entschieden grundlagenorientierten, geisteswissenschaftlichen Bausteins in der Geographie benennen (vgl. Korf & Verne 2016).

Dies sind die grundsätzlichen inhaltlichen und perspektivischen Rahmungen einer Arbeit, die zugleich nicht auf Ordnung und Struktur verzichten möchte. An dieser Stelle werden deshalb Gliederung und Aufbau vorgestellt.

## B) ORDNUNGEN

„Geographen haben einen nahezu leidenschaftlichen Hang zu gliedern, zu regionalisieren, zu charakterisieren und zu strukturieren. [...] Wissen braucht [...] Struktur und wer die Welt verstehen will, sucht nach Ähnlichkeiten, nach einer inhaltlichen Dimension [...] und globalen Ordnungsmustern als Orientierungswissen“ (Gebhardt et al. 2011d: 14).

Auch dieser Studie muss eine – möglichst überzeugende – Struktur gegeben werden. Diese soll dem Leser hier begründet dargelegt werden.

Diese Arbeit sei grob in fünf Akten abgehandelt: Der erste (Kap. 1) umfasst – unter dem Titel ‚Navigation‘ – eine grundlegende Einleitung zwecks Herleitung des Vorhabens in dreierlei Hinsicht: mit Betonung der Relevanz von Wirtschaft und Recht in Raum und Zeit (a), mit Blick auf die der Studie inhärenten Ordnungen (b) sowie durch Vorstellung der Grenzen des Vorhabens (c). Hier-nach soll die Kontextualisierung erfolgen (Kap. 2): Zunächst mit Blick auf die Historiographie, auf sinnvolle Vorarbeiten anderer Autoren und den allgemeinen Forschungsstand (a), wobei ein Überblick über den Gegenstand ‚Migrationsgeschichte(n) des Indischen Ozeans‘, über den theoretischen Zugang der Arbeit via das Konzept der ‚Performativität normativer Ordnungen‘ sowie zur inter-, trans- oder bisweilen auch postdisziplinären Kulturtheorie gegeben wird. Sodann folgen ein kurzer Abriss über die Kolonialgeschichte Südasiens (b) und eine Erläuterung zentraler Aspekte der maritimen Handelsgeschichte des Indischen Ozeans (c) mit Subkapiteln zum *British Empire*, zum maritimen Arbeitsmarkt sowie zum

sogenannten ‚*Steamship Empire*‘ zwecks Kontextualisierung des empirischen Fallbeispiels.

Anschließend widmet sich das nächste Kapitel der behandelten Hauptquelle – den Lebensgeschichten im von Adams herausgegebenen Buch „Across Seven Seas and Thirteen Rivers. Life Stories of Pioneer Sylhetti Settlers in Britain“ (1987a) – und der Methode dieser Arbeit (Kap. 3). Dabei werden die in kulturtheoretischer Lesart ausgerichtete historisch-geographische Herangehensweise dieser Studie (a), der Quellen- und Methodenbegriff *Oral History* nach Vorstellung der Hauptquelle und unter Berücksichtigung quellenkritischer Reflexionen (b) sowie Überlegungen zur hier verwendeten diskurs- bzw. dispositivanalytischen Methode (c) diskutiert. Das Kapitel fungiert somit letztlich als methodologisches Schanier zwischen einerseits den zuvor getroffenen grundlegenden historiographischen und kontextualisierenden Erwägungen sowie andererseits der erkenntnisgenerierenden, recht ausführlichen Analyse unter dem Titel ‚Textualisierung: Eine Dispositivanalyse der Macht‘ (Kap. 4), die sich zunächst allgemein-theoretisch und dann konkret-empirisch mit den Wirkweisen und Realisierungen von Wirtschaft und Recht befasst.

Dieses Kapitel beginnt in diesem Sinne mit einem Überblick über ‚Wirtschaft und Recht nach den *Cultural Turns*‘ (a), der seine Berechtigung aus einer notwendigerweise möglichst umfassenden, integrativ Ökonomie und Recht behandelnden Einbettung dieser stark grundlagentheoretisch ausgerichteten Arbeit in den größeren Zusammenhang des Oberthemas normative Ordnungen bzw. ‚Macht-(W)Orte‘ einerseits sowie in aktuelle (über-)fachliche Debatten bzw. den Forschungs(gegen)stand andererseits zieht. Wie sich allerdings zumindest rückblickend, d.h. nach Erfassung der Gesamtheit der vorliegenden Arbeit durch den Leser zeigen wird, ist diese Ausführlichkeit überaus sinnvoll, um den anschließenden empirischen Nachvollzug der komplexen Wirkkraft und Reproduktionen der ökonomischen und rechtlichen Macht gewährleisten zu können: Sinn dahinter ist die gezielte Vorbereitung des Lesers auf die Auseinandersetzung mit den Lebensgeschichten der behandelten Migranten (b). Diese spannt als die eigentliche Analyse einen Bogen, der empirisch gesättigt die vielfältigen Wirtschaftswirkungen und Rechtsrealisierungen in bzw. durch die Lebensgeschichten der südasiatischen *Lascars* kennzeichnet. Dabei werden, ohne Vollständigkeit zu beanspruchen, die neun Kategorien *Geld, Konsum, Arbeit, Netzwerke, Orte, Nation, Bildung, Normen* sowie *Infrastrukturen* gebildet – als zentrale Dimensionen ökonomischer und/oder rechtlicher Realitäten. Die jeweils zugeordneten Zitate könnten in diesem Kontext oftmals eigentlich unter mehrere dieser Dimensionen fallen; um Redundanzen zu vermeiden sowie aus Platzgründen, hat sich der Verfasser allerdings für klare Zuordnungen zu jeweils *einer* der Kategorien ent-

schieden. Gleichwohl soll des Öfteren auf Verknüpfungsmöglichkeiten und Querverbindungen hingewiesen werden.

Im letzten Teil (Kap. 5) der Arbeit möge schließlich nachbereitend ein mit dem Terminus ‚Horizonte‘ betitelter, vorsichtiges wie vorläufiges Fazit gezogen werden, das auch als Ausblick auf weitergehende, in Verbindung mit den Inhalten dieser Arbeit stehende Forschungsfragen gelesen werden kann, sich im Sinne einer erneuten triadischen Struktur in drei Unterkapitel auffächert und schlussendlich den Blick auf den Anhang (Kap. 6) incl. einer Zeittafel (a), wichtigen Karten (b) und den abschließenden, obligatorischen bibliographischen Angaben nebst Quellenverzeichnis (c) freigeben wird. Auf regelmäßige Teilzusammenfassungen und Zwischenstände wird vor dem Fazit weitestgehend verzichtet; dies soll insbesondere in den ‚Konklusionen‘ (a), durch die Nennung der wichtigsten Ergebnisse dieser Arbeit – unter die Konzepte ‚Selbstökonomisierung‘ (1) und ‚Selbstverrechtlichung‘ (2) subsumiert – nachgeholt werden. In den ‚Perspektiven‘ (b) geht es dagegen eher um potenzielle anschließende Fragen, die sich aus dieser Arbeit unmittelbar ergeben (könnten); als konkretes Beispiel werden dabei insbesondere der Bereich der Politik als eine weitere normative Ordnung großer Wirkkraft vorgestellt und im Zuge dessen erste Assoziationen dargelegt. Das letzte Unterkapitel ‚Reflexionen‘ (c) geht gar noch einen Schritt weiter und reflektiert grundlegende Ökonomisierungsprozesse unserer heutigen Zeit.

Gleichwohl, aller versuchten Struktur zum Trotz, wirkt hier möglicherweise bewusst nicht alles wie aus einem Guss. Die im Folgenden angewendete assoziativ arrangierte Perspektive (er-)öffnet nämlich so manche unerwartete Dependence bzw. Zweigstelle, macht des Öfteren neue Bearbeitungsfelder auf, um regelmäßig auf potenzielle Anknüpfungspunkte für den Leser hinzuweisen.

## C) GRENZEN

Da die beiden Themen Wirtschaft und Recht in *einer* Monographie verhandelt werden und dabei unter *einer* übergreifenden Fragestellung, mit dem gleichen Quellenkorpus und dem gleichen methodischen wie theoretisch-konzeptionellen Ansatz erarbeitet wurden, können durchaus Dopplungen zwischen einzelnen Passagen dieser Arbeit auftreten. Dies lässt sich kaum vermeiden und ist gleichzeitig notwendig, wenn die Studie mit dem Ziel geschrieben wird, die Interdependenzen zwischen den beiden normativen Ordnungen in ihrem hegemonialen Zusammenspiel zu dekonstruieren. Beispielsweise können einige Zitate sowohl mit Bezug zu Wirtschaft als auch mit Blick auf Recht analysiert werden. Solch potenzielle Dopplungen oder sinngemäße Wiederholungen sollten nicht gerügt,

sondern als Indikator für die Verwebungen von Ökonomie und Recht akzeptiert und gerne auch eingefordert werden, da dies erklärtes Ziel des großen Vorhabens mit dem Oberbegriff „Macht-(W)Orte“ ist. Auch wird sich so manche inhaltlich und/oder sprachlich ähnlich klingende Aussage finden, was – neben den zuvor schon erwähnten Punkten – nicht zuletzt der *einen* Feder, aus der die Sätze der vorliegenden Arbeit entspringen, geschuldet ist. Die Studie „Macht-(W)Orte“ möchte allerdings nie ein Fazit ziehen, sondern eher als Aufmunterung und Anreiz verstanden werden, als interessierter Leser Macht weiter und breiter zu denken. Auch andere Macht-Felder jenseits von Wirtschaft und Recht sind sicherlich denkbar und sollten in anderen Arbeiten auch diskutiert werden.

Neben diesen inhaltlichen Warnungen muss auf sprachlich-expressives Konfliktpotenzial eingegangen werden. Schließlich gilt immer: „We are, it would seem, caught up in language and the very process of arriving at a research question obviously takes place within language“ (Allen 2003: 12). Dieses Unterkapitel zu den Grenzen dieser Studie widmet sich daher auch der Sprache dieser Arbeit. Denn ‚Geschichte schreiben‘ zu wollen, beinhaltet immer auch eine Reflexion über den eigenen sprachlichen Stil.<sup>14</sup>

Wie in der geographischen Dissertation des Autors (Schwegmann 2016), wagt sich auch diese Arbeit bisweilen an einen essayistischen Ausdruck, wie er in literarischen oder journalistischen Abhandlungen anzutreffen ist.<sup>15</sup> Dabei finden sich im Rahmen dieser Arbeit gleichwohl auch eher ‚gewöhnliche‘ Formulierungen, die Hand in Hand mit stärker bildreich-essayistischen Stilen gehen.<sup>16</sup>

---

14 Ein anregender selbstreflektierender Text, insbesondere für diskurstheoretisches Schreiben, findet sich in Angermüllers Abhandlung „Zum wissenschaftlichen Schreiben in der Diskursforschung“ (Angermüller 2014b).

15 Dabei könnte man sich Schärf anschließen, der betont: „Der Essay lässt sich nicht als bloß literarisches Phänomen bestimmen, sondern ist stets in einer Lebenshaltung oder gar Lebenskunsthaltung verwurzelt. Darum kann man von Essayistischem auch dann sprechen, wenn gar kein Essay im Sinne eines in nichtfiktionaler Prosa gehaltenen Textes vorliegt“ (Schärf 2014: 51).

16 In den Worten von Boeckler: „Auch wenn kulturelle Geographien keine Normierung des Schreibprozesses anstreben, so tendieren sie doch zur essayistischen und narrativen Seite der Auseinandersetzung. Hin und wieder wechseln sie aber auch die Fronten, formulieren einzelne Abschnitte stärker in einer analytischen Art und Weise, werden mitunter sehr konventionell und sehen sich genötigt, daran zu erinnern, warum sie es tun: Weil es kontingente Normierungsversuche sind, die sich als Lese-Erwartungen der scientific community erhalten haben, und man beispielsweise aus biographischen

Diese „Widersprüche muss man aushalten können, wer hat heute schon noch Konsistenzenerwartungen?“ (Berndt & Boeckler 2008: 70).

Hintergrund dieser Attitüde ist, *erstens*, zu neuen Gedanken zu (ver-)führen. Denn wenn in der Wissenschaft nicht die Ballzauberer, sondern die Platzwarte das Sagen haben, bleiben Innovationen weitgehend aus. Daher geht es zwar, *zweitens*, auch um Freude beim Schreiben (vgl. „pleasurably write“, Bingham 2003: 161), doch noch vielmehr, *drittens*, um reflexives, sich selbst reflektierendes Schreiben („writing reflexively“, ebd.: 145 ff.). In eigenwilliger Eigenreflexion sollen hier neue Denkzentralen installiert werden. Eigenreflexion, in ihrer spezifisch subjektiven Form, meint allerdings nicht Beliebigkeit.<sup>17</sup>

Schärf schreibt in diesem Zusammenhang auch von einem „Prozessparallelogramm zwischen Leben, Denken und Schreiben“ (Schärf 2014: 52). Er konstatiert: „Was den Essay [...] von [...] den meisten [...] Darstellungsweisen abhebt, ist die Signatur der produktiven Selbstreflexion im Schreibprozess“ (ebd.: 55). Mit pikanter Note versetzt, suggerieren kulturtheoretische Lesarten nämlich voll unberechenbarer Polemik prächtige Prozesse der Entstehung neuer Denkräume durch „die konsequente Anwendung des schöpferischen Prinzips der Neugier“ (Helbrecht 2003a: 149). Der Hintergrund dieser Ausrichtung: Vom Mainstream abweichendes Verhalten kann überaus innovative Ergebnisse ermöglichen.

Eine der vielen Geschichten, die sich über Ökonomie und Recht schreiben lassen, soll hier daher erzählt werden. Gleichwohl, und dies soll nicht unerwähnt bleiben: Diese Darstellung kassiert sicherlich auch Kritik. Dennoch: Nicht jede Abweichung vom wissenschaftlichen Mainstream verdient es, gewissermaßen automatisch, reflexartig, pathologisiert zu werden. Kreatives Querdenken mit unorthodoxen Lösungs-Mitteln sollte stattdessen als intendierte Reizzufuhr, die Neues – gleichsam durch bewusst gesetzte, aber daneben auch zufällig (im Entstehen gelassene Reibungsprozesse als Injektion einer bloßen Möglichkeitsvorstellung, anders zu arbeiten – schaffen kann, bewertet werden. In irritierender

---

Gründen diese Erwartungen zu erfüllen hat. Nicht aber, weil es die beste Form der Darstellung ist“ (Boeckler 2005: 17 f.).

- 17 Denn „Thema und Gegenstand sind dem Essayisten nicht irgendwie gegeben, sondern werden mit der Abfassung des Essays, in der Schreibbewegung, überhaupt erst hervorgebracht. Und doch sind Gegenstand und Schreibbewegung keineswegs identisch. In den seltensten Fällen schreibt ein Essayist allein darüber, dass er schreibt. Aber er schreibt darüber immer auch. Ein Thema wird schreibend aus einem Erzählverfahren geboren, das sich selbst als performativer Akt, als Schreibakt, mitreflektiert. Eben darin ist der Essay von anderen Spielarten [...] zu unterscheiden“ (Schärf 2014: 51 f.).



Absicht schleudert der Autor potenziell provokant wirkende Frage- und Ausrufezeichen in die Manege der Leser.

Dabei geht es nicht um Fragen der ‚objektiven‘ Richtigkeit, sondern um reüssierende Argumentationslinien, die Diskursmuster entschleiern wollen. Es geht um das Aufzeigen der (all-?)umfassenden Wirkung von Ökonomie und Recht, es geht um die Betonung des verunordnenden Hineinwirkens dieser machtvollen Ordnungssysteme in sämtliche menschliche Lebensbereiche und vielerlei Realitäten, um die Dechiffrierung normativer Systemimmanenz. Mit Kaube (2014: 60) können wir nämlich, hieran anschließend, feststellen, dass ein derartiges hermeneutisches Arbeiten, vom Ausdruck her als wissenschaftlicher Essay auffassbar, als hochgradig subjektiv und konstruktivistisch angelegt ist.<sup>18</sup>

Als Arbeit, die von einem wissenschaftlich in der Humangeographie – noch dazu in einer kulturtheoretischen Les- bzw. Abart dieser – sozialisierten Forscher geschrieben wurde, mag in dieser vielfach eine ‚andere‘ Herangehensweise als in anderen rechts- oder geschichtswissenschaftlichen Abhandlungen sowie eine ‚spezielle‘, eigenwillige Sprache verwendet werden. Kurzum: Die Affinität des Autors für zäh- und dickflüssiges Konterkarieren könnte so manchen Leser düpiieren. Denn eine sich verspielt verspielende Schreibweise, gleich einer spielerisch beispielbaren Spielweise, die vom Publikum als essayistisch entlarvt – oder ge(t)adelt? – werden könnte, dürfte den Bogen insofern in sprachlich-expressiver Hinsicht so manches Mal überspannen, als sie allzu strenge Gestaltungsregeln über Bord wirft.<sup>19</sup>

Im Laufe der vorliegenden Abhandlung wird der Pinsel mal schraffierend, mal konturierend angesetzt. Dabei zeichnet sich eine verwinkelte Szenerie voll assoziativer Kombinationen, die ökonomische und rechtliche Welten in neue Kategorien auf-fassen, be-greifen, ver-handeln möchte. In einer derartigen Abhand-

---

18 Kaube (2014: 60) charakterisiert den Essay gerade als „Mitteilung eines Individuums über Individuelles“, als „höchste Freizeitform der schönen Geisteswissenschaften“, was spezifische Aussagen über den Autoren zulasse und zugleich konkrete Anforderungen an den Leser stelle.

19 Dadurch erscheinen diese Zeilen schnell als wenig authentisch, als artifiziell, überladen – was aber durchaus seine Berichtigung haben kann, wenn wir Kaube folgen. So sei „jeder Beitrag eine Welt für sich und zwar eine schöne oder jedenfalls berührende. Schreiben ist hier der Versuch, eine der Sache selbst – nicht dem Publikum und der Sprech- oder Schreibsituation – angemessene Darstellung zu finden. Und die Sache selbst ist schön, Kultur, Bedeutung, Wahrheit anstatt bloß Richtigkeit [...]. Das ‚Hauptsache die Information kommt an‘ vieler Disziplinen erscheint darum hier inadäquat“ (Kaube 2014: 59).

lung lassen sich bisweilen gar Spuren von Poesie finden. Denn Kulturtheorie, wie der Autor sie versteht, ist ständig auf der Suche nach neuem Vokabular. Daher versucht sie sich nun in der Subsumtion wirtschafts- und rechtsbezogener Fragestellungen unter innovative Konzepte, semantische Gabelungen. Diese theoretische Grundlagenforschung ist dabei ein probates Mittel, um neue Denkarchitekturen zu ermöglichen, indem sie eigenwillig(e) Geschichte(n) erzählt.

Recht und Wirtschaft werden so auch sprachlich in eine neue Form gegossen, werden so gerade in radikal-essayistischen Kulturtheoretisierungen mitunter beißend satirisch bis zur Unkenntlichkeit verfremdet. Denn das jeweilige Rechtsbewusstsein und die jeweiligen Wirtschaftsverständnisse reproduzieren Recht und Ökonomie. Die hier vorgestellte Art des Arbeitens, zur Essenz postmoderner Studien geronnen, okkupiert vor diesem Hintergrund immer neue Räume wirtschaftlicher wie rechtlicher Relevanz – mit dem Ziel, unaufhörlich neu(e) trans- oder zumindest interdisziplinär(e) Brücken zu bauen und disziplinär(e) Ketten zu sprengen.
